# Supplementary material for: Aprotinin Inhibits SARS-CoV-2 Replication
Source: MDPI journal article supplement (doi:10.3390/cells9112377), 2020-10-30
Supplement: s1 [file s1]

**Figure S3**

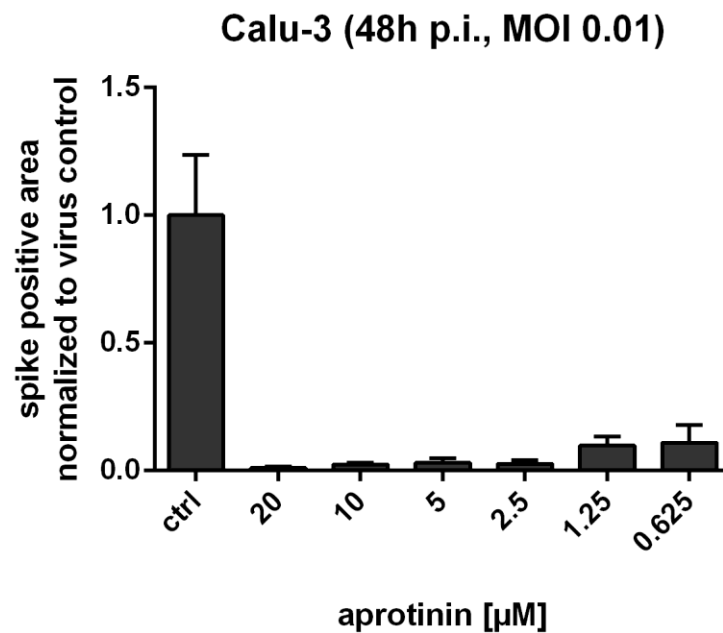

**Figure S3.** Quantification of immunostaining for the spike protein in SARS-CoV-2/FFM7 (MOI 0.01)-infected Calu-3 cells 48h post infection in response to aprotinin treatment.
