# Supplementary material for: Aprotinin Inhibits SARS-CoV-2 Replication
Source: MDPI journal article supplement (doi:10.3390/cells9112377), 2020-10-30
Supplement: s1 [file s1]

**Figure S1**

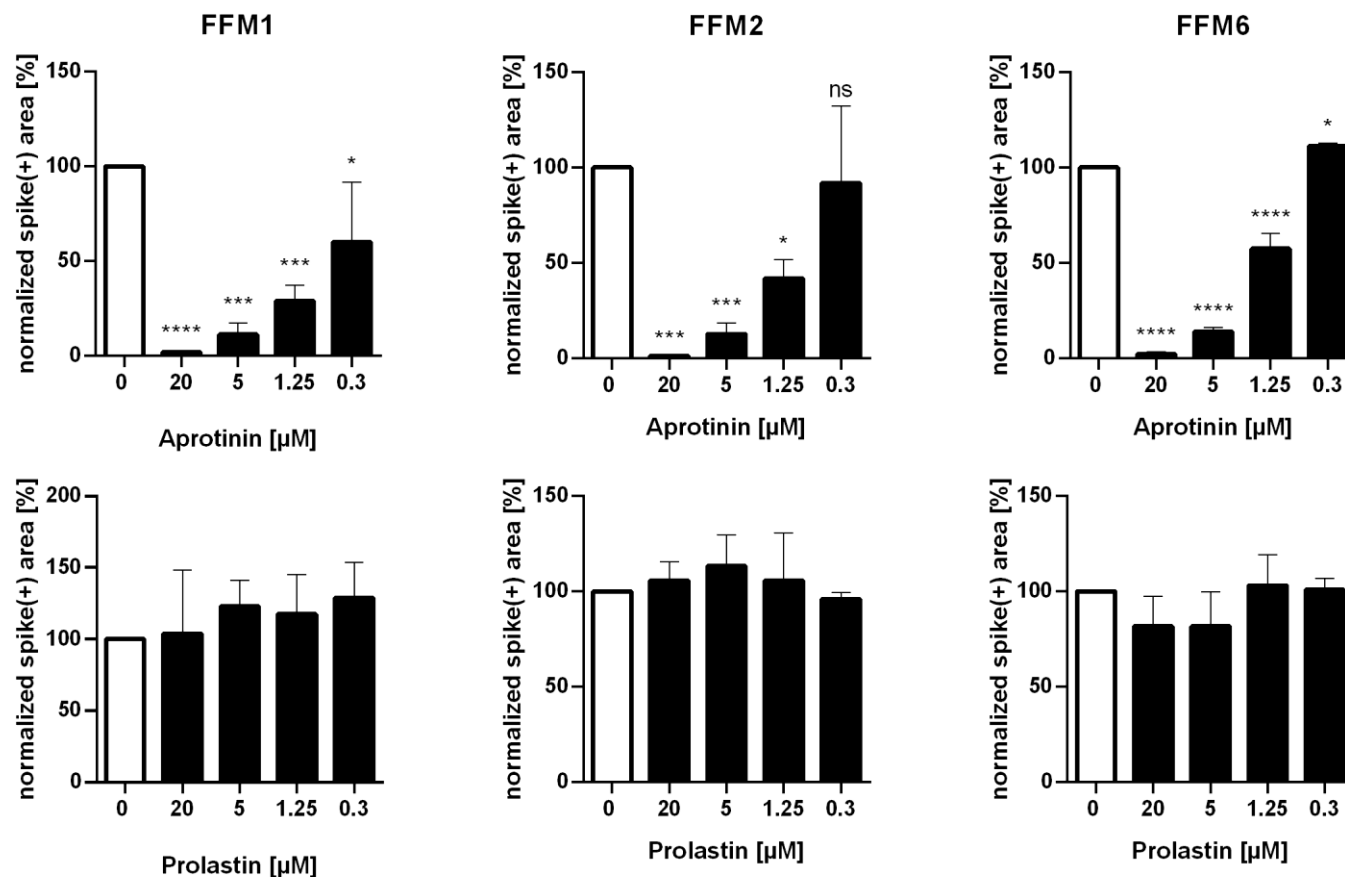

**Figure S1.** Quantification of immunostaining for the spike protein in SARS-CoV-2-infected (isolates FFM1, FFM2, FFM6) Caco2 cells with and without treatment of aprotinin or SERPINA1/ alpha-1 antitrypsin (prolactin) presented in Figure 2B.
