# Supplementary material for: Aprotinin Inhibits SARS-CoV-2 Replication
Source: MDPI journal article supplement (doi:10.3390/cells9112377), 2020-10-30
Supplement: s1 [file s1]

Figure S4

TMPRSS2

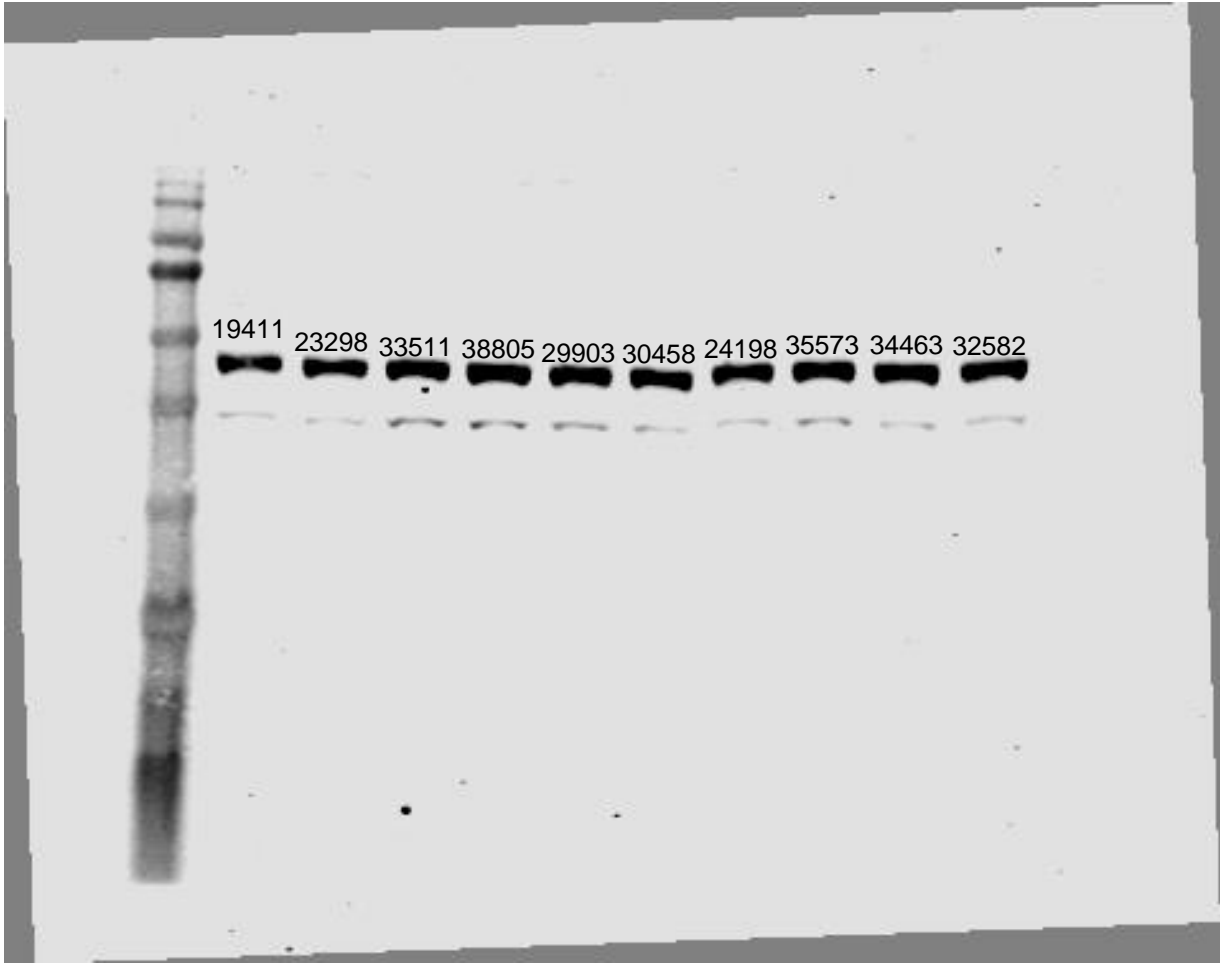

Figure S4

N

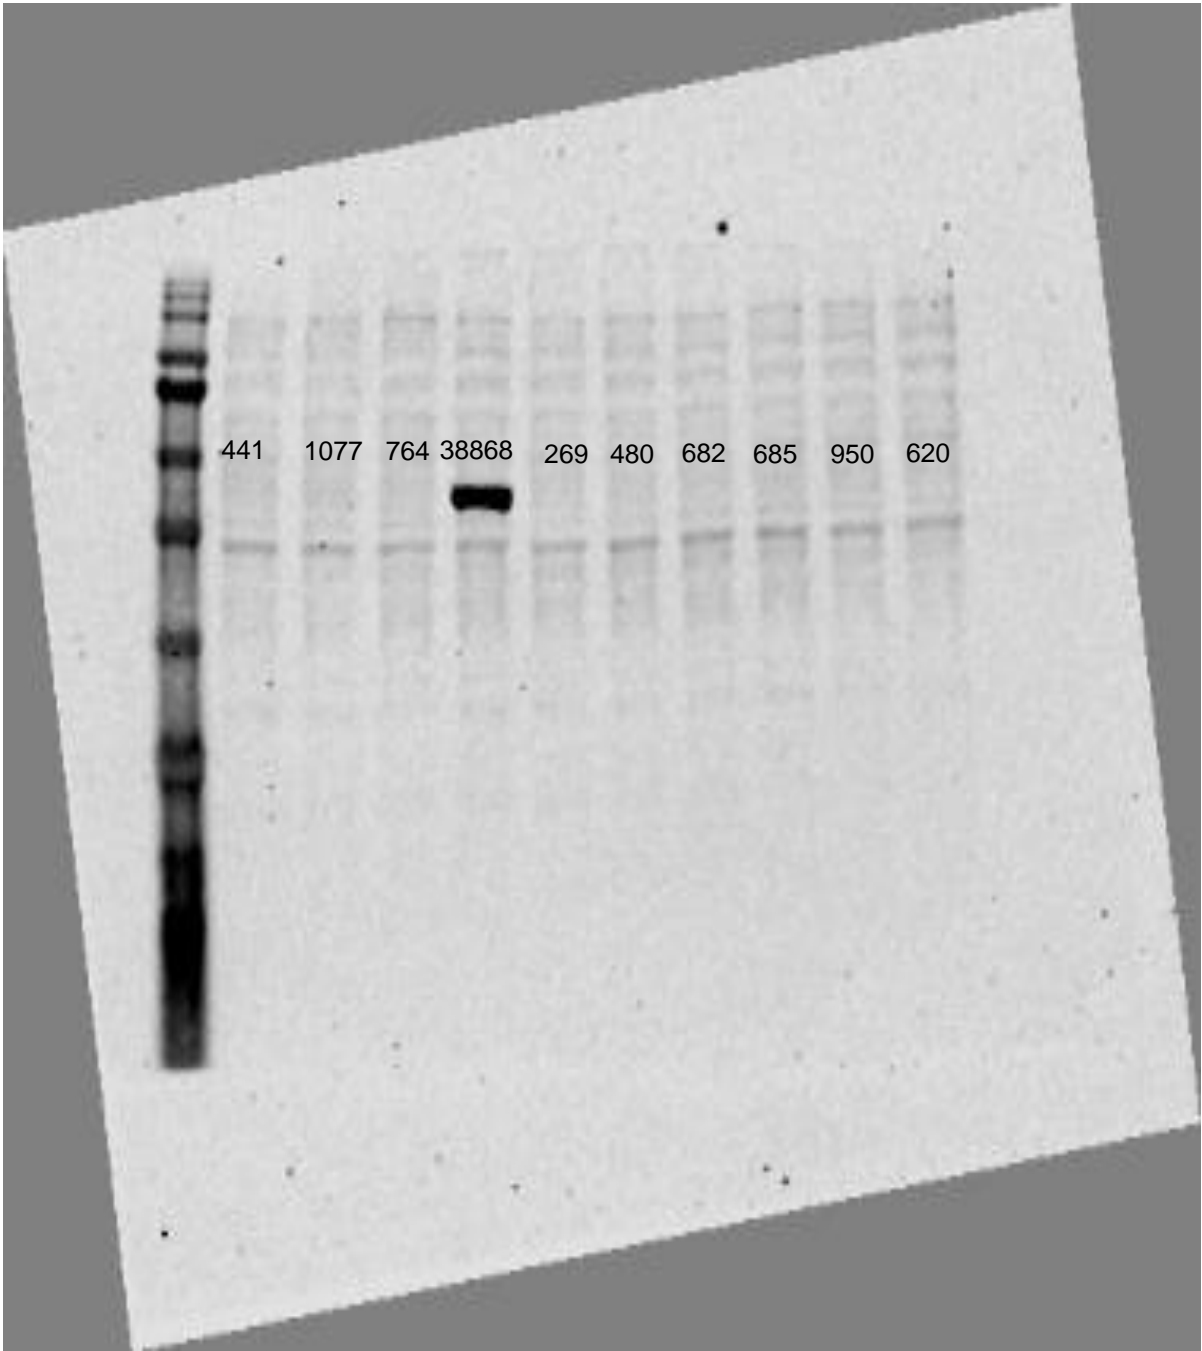

Figure S4

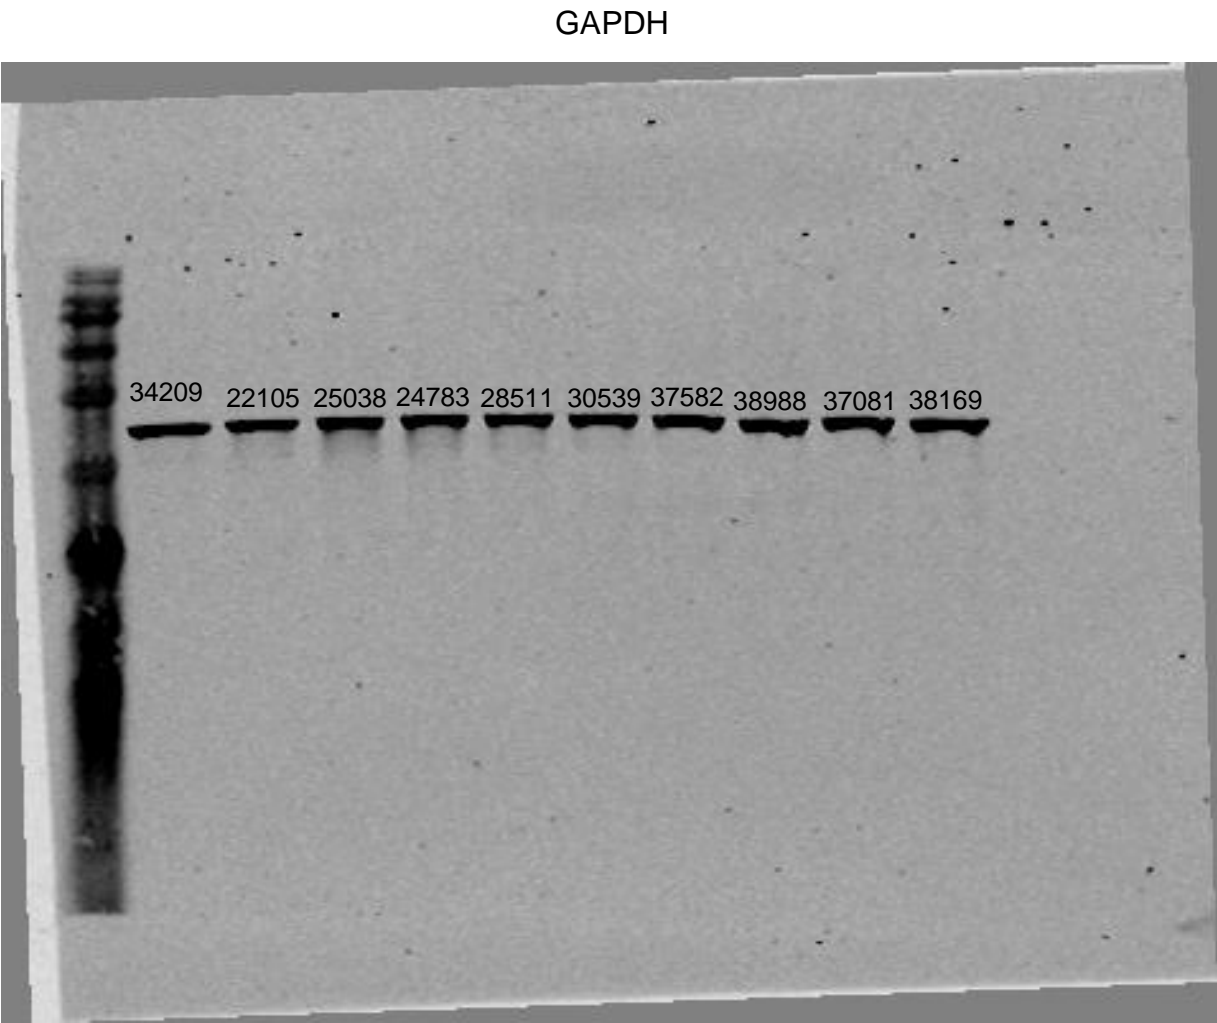

**Figure S4.** Uncropped Western blots corresponding to Figure 4B. Quantification was performed by laser-induced fluorescence using an infrared scanner (Odyssey, Li-Cor Biosciences) and Image Studio version 3.1 software.
