# Supplementary material for: Aprotinin Inhibits SARS-CoV-2 Replication
Source: MDPI journal article supplement (doi:10.3390/cells9112377), 2020-10-30
Supplement: s1 [file s1]

**Figure S2**

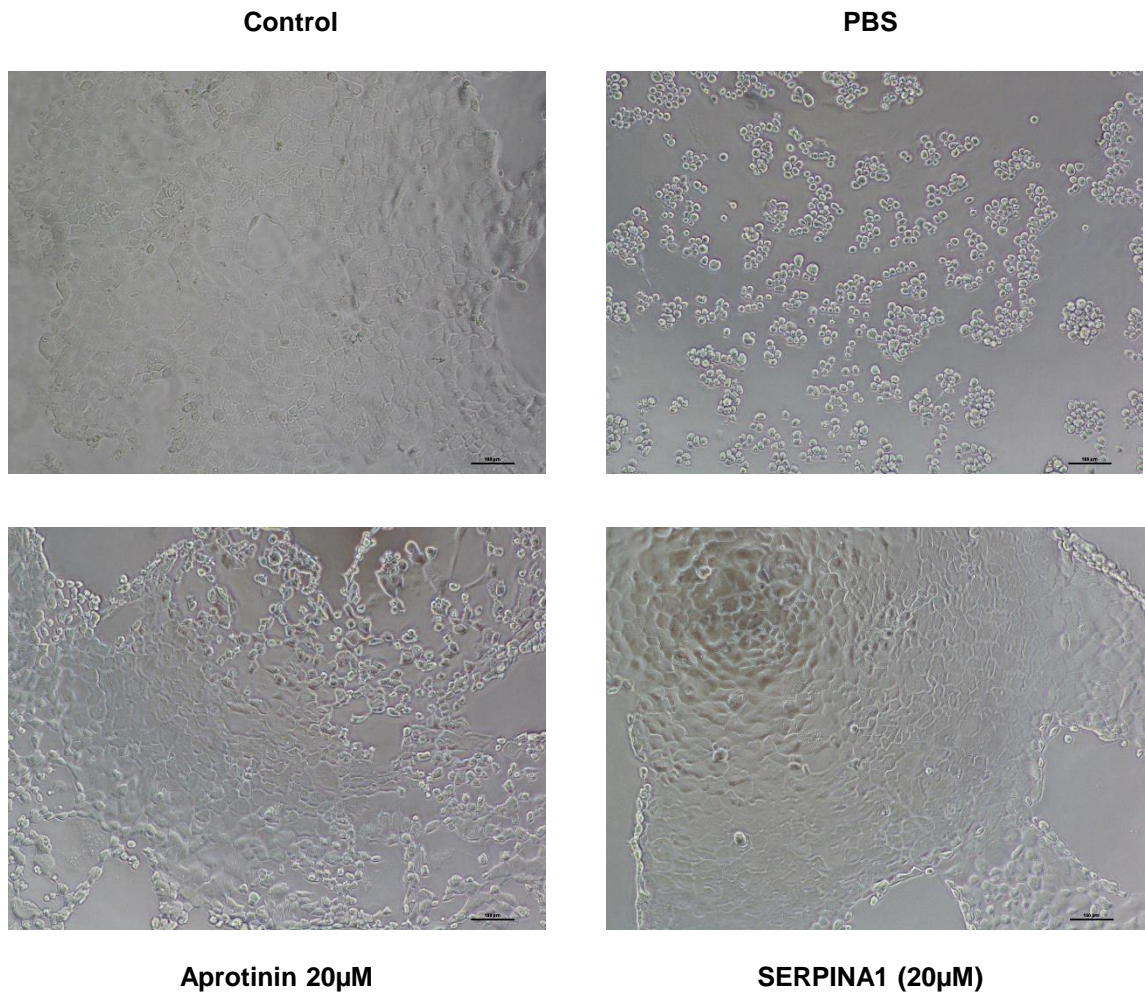

**Figure S2.** Trypsin inhibition by aprotinin and SERPINA1/ alpha-1 antitrypsin. Nearly confluent Caco2 cell cultures were washed three times with PBS and incubated with 400μg/ mL trypsin alone or in combination with aprotinin 20μM or SERPINA1 20μM for 2h.

**Figure S2**

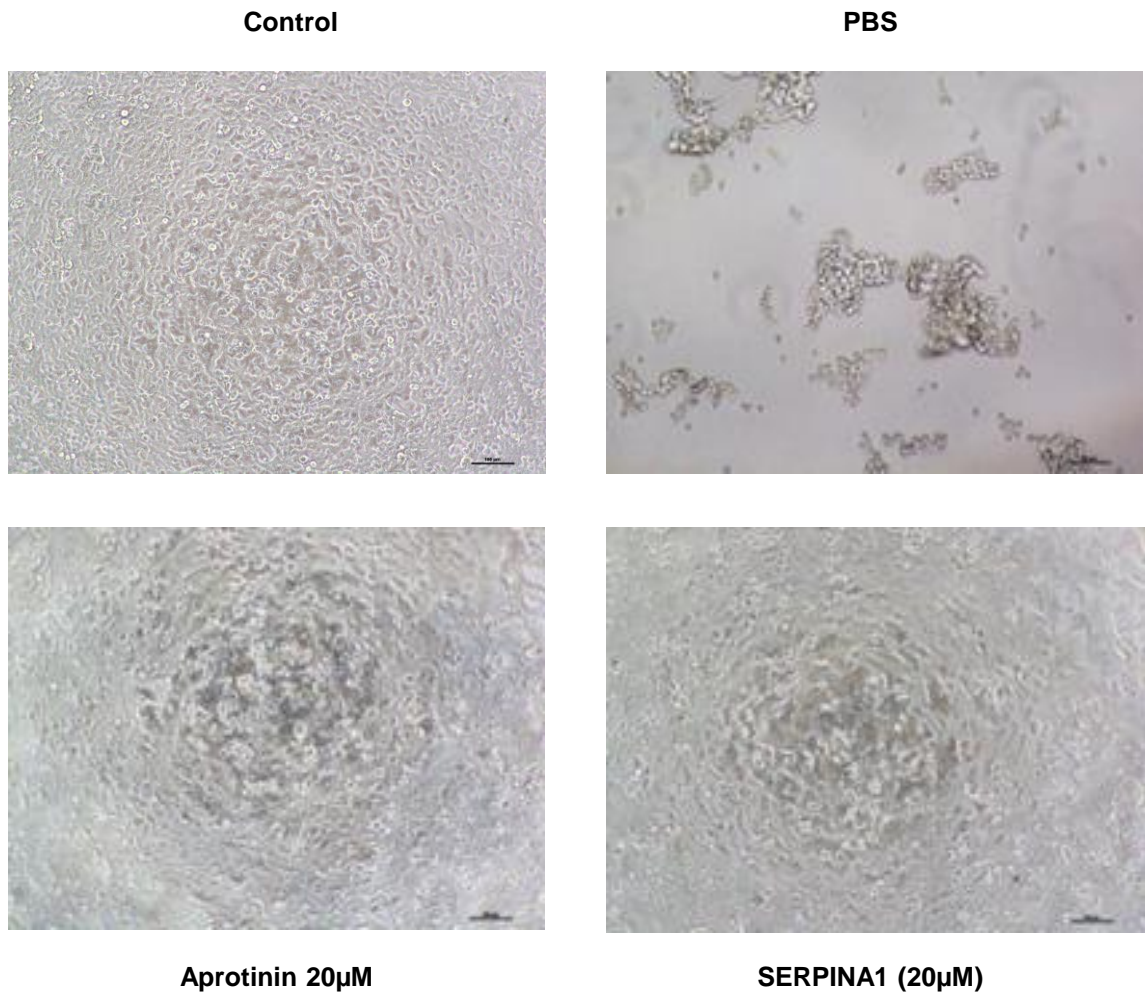

**Figure S2.** Trypsin inhibition by aprotinin and SERPINA1/ alpha-1 antitrypsin. Nearly confluent A549 cell cultures were washed three times with PBS and incubated with 400μg/ mL trypsin alone or in combination with aprotinin 20μM or SERPINA1 20μM for 2h.
